# Supplementary material
Source: MDPI journal article supplement (https://www.mdpi.com/2673-4540/4/3/33)
Supplement: s1 [file s1]

Archive with 1 entries (1 files):
- supplementary File S1.pdf
