# Supplementary material
Source: MDPI journal article supplement (https://www.mdpi.com/2673-4540/4/3/33)
Supplement: s1 [file s1 › supplementary File S1.pdf]

## Questionnaire

### Part A: Socio-demographic Information

Gender: M / F    Age: \_\_\_\_\_    Occupation: \_\_\_\_\_

Level of Education: ☐ None   ☐ Primary   ☐ Secondary   ☐ Tertiary

Residence: ☐ Urban   ☐ Rural

Residential District: \_\_\_\_\_ Province: \_\_\_\_\_

### Part B: Person-related Barriers

1. Please indicate (by ticking the appropriate box) if any of these is a barrier to your uptake of diabetic retinopathy screening services and to what extent (where **1 means that it is not a barrier** at all and **10 means that it is a very strong barrier**).

|                                            | 1 | 2 | 3 | 4 | 5 | 6 | 7 | 8 | 9 | 10 |
|--------------------------------------------|---|---|---|---|---|---|---|---|---|----|
| Insufficient income (cost)                 |   |   |   |   |   |   |   |   |   |    |
| Good vision in the fellow eye              |   |   |   |   |   |   |   |   |   |    |
| No symptoms                                |   |   |   |   |   |   |   |   |   |    |
| Eye problem is not serious enough          |   |   |   |   |   |   |   |   |   |    |
| Time constraints/other priorities/too busy |   |   |   |   |   |   |   |   |   |    |
| No escort or guardian to help              |   |   |   |   |   |   |   |   |   |    |
| Culture/traditional beliefs                |   |   |   |   |   |   |   |   |   |    |
| Forgot or no reminder                      |   |   |   |   |   |   |   |   |   |    |
| Poor knowledge about diabetic retinopathy  |   |   |   |   |   |   |   |   |   |    |
| Prefer to use alternative service          |   |   |   |   |   |   |   |   |   |    |

Any comments:

**Part C: Service-related Barriers**

2. Please indicate (by ticking the appropriate box) if any of these is a barrier to your uptake of diabetic retinopathy screening services and to what extent (where **1 means that it is not a barrier** at all and **10 means that it is a very strong barrier**).

|                                                        | 1 | 2 | 3 | 4 | 5 | 6 | 7 | 8 | 9 | 10 |
|--------------------------------------------------------|---|---|---|---|---|---|---|---|---|----|
| I was not well informed that I needed an eye screening |   |   |   |   |   |   |   |   |   |    |
| Do not know where to get services                      |   |   |   |   |   |   |   |   |   |    |
| Eye/screening centers are too far                      |   |   |   |   |   |   |   |   |   |    |
| Long waiting time at the eye/screening center          |   |   |   |   |   |   |   |   |   |    |
| Low quality of care by eye doctors and clinicians      |   |   |   |   |   |   |   |   |   |    |
| Eye/screening center staff are unfriendly              |   |   |   |   |   |   |   |   |   |    |
| Fear of procedure complications                        |   |   |   |   |   |   |   |   |   |    |
| Lack of trust in healthcare institutions               |   |   |   |   |   |   |   |   |   |    |

Any comments:

**Part D: Management of Diabetes**

3. Are you currently taking any diabetes treatment? ☐ Yes ☐ No

If **yes**, please indicate the type of treatment/management:

---

If **no**, please provide reason(s):

\*\*\*\*\*Thank you\*\*\*\*\*
